# Supplementary material
Source: PubMed Central journal article supplement (PMC4859809)
Supplement: NIHMS781919-supplement-S1.pdf [file NIHMS781919-supplement-S1.pdf]

Supplementary information S1 | **Mutations of miRNA biogenesis pathway components in human cancers**

| Location      | Mutation    | Number | Type    | Cancer Type                  |
|---------------|-------------|--------|---------|------------------------------|
| <b>DROSHA</b> |             |        |         |                              |
| Q46*          | Non-sense   | 3      | Somatic | Wilms tumors <sup>1, 2</sup> |
| M120V         | Mis-sense   | 1      | Gemline | Wilms tumors <sup>3</sup>    |
| P211T         | Mis-sense   | 1      | Somatic | Wilms tumors <sup>1</sup>    |
| R279C         | Mis-sense   | 2      | Gemline | Wilms tumors <sup>4</sup>    |
| R414*         | Non-sense   | 3      | Somatic | Wilms tumors <sup>1, 2</sup> |
| E696V         | Mis-sense   | 2      | Somatic | Wilms tumors <sup>2</sup>    |
| L728V         | Mis-sense   | 1      | Somatic | Wilms tumors <sup>3</sup>    |
| R967W         | Mis-sense   | 1      | Gemline | Wilms tumors <sup>3</sup>    |
| E969K         | Mis-sense   | 2      | Somatic | Wilms tumors <sup>2</sup>    |
| D973H         | Mis-sense   | 1      | Somatic | Wilms tumors <sup>4</sup>    |
| S990R         | Mis-sense   | 1      | Somatic | Wilms tumors <sup>4</sup>    |
| E993K         | Mis-sense   | 5      | Somatic | Wilms tumors <sup>2, 4</sup> |
| E1147K        | Mis-sense   | 81     | Somatic | Wilms tumors <sup>1-4</sup>  |
| E1147V        | Mis-sense   | 1      | Somatic | Wilms tumors <sup>2</sup>    |
| D1151Y        | Mis-sense   | 1      | Somatic | Wilms tumors <sup>3</sup>    |
| D1151A        | Mis-sense   | 2      | Somatic | Wilms tumors <sup>2</sup>    |
| D1151H        | Mis-sense   | 1      | Somatic | Wilms tumors <sup>2</sup>    |
| D1151G        | Mis-sense   | 5      | Somatic | Wilms tumors <sup>1, 2</sup> |
| Q1186K        | Mis-sense   | 1      | Somatic | Wilms tumors <sup>4</sup>    |
| Q1187K        | Mis-sense   | 5      | Somatic | Wilms tumors <sup>2</sup>    |
| D1204Y        | Mis-sense   | 1      | Somatic | Wilms tumors <sup>4</sup>    |
| E1222K        | Mis-sense   | 2      | Somatic | Wilms tumors <sup>2, 4</sup> |
| E1222G        | Mis-sense   | 2      | Somatic | Wilms tumors <sup>2</sup>    |
| I1225M        | Mis-sense   | 1      | Somatic | Wilms tumors <sup>4</sup>    |
| <b>DGCR8</b>  |             |        |         |                              |
| R32fs         | Frame-shift | 1      | Somatic | Wilms tumors <sup>1</sup>    |
| G55S          | Mis-sense   | 1      | Somatic | Wilms tumors <sup>1</sup>    |
| G71*          | Non-sense   | 1      | Somatic | Wilms tumors <sup>2</sup>    |
| K82*          | Non-sense   | 1      | Somatic | Wilms tumors <sup>4</sup>    |
| S92R          | Mis-sense   | 1      | Somatic | Wilms tumors <sup>1</sup>    |

|               |             |    |                |                                       |
|---------------|-------------|----|----------------|---------------------------------------|
| E213*         | Non-sense   | 1  | Somatic        | Wilms tumors <sup>4</sup>             |
| Y239*         | Non-sense   | 1  | Somatic        | Wilms tumors <sup>2</sup>             |
| E518K         | Mis-sense   | 45 | Somatic        | Wilms tumors <sup>1, 2, 4</sup>       |
| A558T         | Mis-sense   | 1  | Somatic        | Wilms tumors <sup>1</sup>             |
| K588R         | Mis-sense   | 2  | Germline       | Wilms tumors <sup>4</sup>             |
| L694S         | Mis-sense   | 1  | Somatic        | Wilms tumors <sup>2</sup>             |
| S720N         | Mis-sense   | 1  | Germline       | Wilms tumors <sup>3</sup>             |
| Y721H         | Mis-sense   | 1  | Somatic        | Wilms tumors <sup>1</sup>             |
| <b>XPO5</b>   |             |    |                |                                       |
| C50R          | Mis-sense   | 1  | Somatic        | Wilms tumors <sup>2</sup>             |
| R159*         | Non-sense   | 2  | Germline       | Wilms tumors <sup>2</sup>             |
| Y316*         | Non-sense   | 1  | Somatic        | Wilms tumors <sup>2</sup>             |
| R440*         | Non-sense   | 2  | Somatic        | Wilms tumors <sup>2</sup>             |
| R440Q         | Mis-sense   | 1  | Somatic        | Wilms tumors <sup>2</sup>             |
| Q572fs        | Frame-shift | 1  | Somatic        | Wilms tumors <sup>2</sup>             |
| E822A         | Mis-sense   | 1  | Somatic        | Wilms tumors <sup>2</sup>             |
| V832I         | Mis-sense   | 1  | Somatic        | Wilms tumors <sup>1</sup>             |
| L843P         | Mis-sense   | 1  | Somatic        | Wilms tumors <sup>2</sup>             |
| L927P         | Mis-sense   | 1  | Somatic        | Wilms tumors <sup>2</sup>             |
| S1125*        | Non-sense   | 1  | Somatic        | Wilms tumors <sup>2</sup>             |
| R1167fs       | Frame-shift | 8  | Non-determined | Mix tumors <sup>5</sup>               |
| F1179fs       | Frame-shift | 30 | Non-determined | Mix tumors <sup>5</sup>               |
| K1181fs       | Frame-shift | 39 | Non-determined | Mix tumors <sup>5</sup>               |
| <b>TARBP2</b> |             |    |                |                                       |
| M145fs        | Frame-shift | 9  | Non-determined | Mix tumors <sup>6</sup>               |
| P151fs        | Frame-shift | 63 | Non-determined | Mix tumors <sup>6</sup>               |
| D221G         | Mis-sense   | 1  | Somatic        | Wilms tumors <sup>3</sup>             |
| R296H         | Mis-sense   | 1  | Somatic        | Wilms tumors <sup>1</sup>             |
| R353fs        | Frame-shift | 1  | Somatic        | Wilms tumors <sup>1</sup>             |
| <b>DICER1</b> |             |    |                |                                       |
| R187*         | Non-sense   | 1  | Germline       | Pleuropulmonary blastoma <sup>7</sup> |
| I383fs        | Frame-shift | 1  | Non-determined | Pleuropulmonary blastoma <sup>8</sup> |
| S436fs        | Frame-shift | 1  | Germline       | Pleuropulmonary blastoma <sup>9</sup> |
| R459fs        | Frame-shift | 1  | Germline       | Pleuropulmonary blastoma <sup>7</sup> |
| I461fs        | Frame-shift | 1  | Germline       | Pleuropulmonary blastoma <sup>8</sup> |

|         |             |    |                |                                              |
|---------|-------------|----|----------------|----------------------------------------------|
| E493*   | Non-sense   | 1  | Gemline        | Pleuropulmonary blastoma <sup>10</sup>       |
| R534*   | Non-sense   | 1  | Gemline        | Pleuropulmonary blastoma <sup>10</sup>       |
| R544*   | Non-sense   | 1  | Germline       | Pleuropulmonary blastoma <sup>7</sup>        |
| M552fs  | Frame-shift | 1  | Gemline        | Pleuropulmonary blastoma <sup>10</sup>       |
| M562fs  | Frame-shift | 1  | Germline       | Pleuropulmonary blastoma <sup>7</sup>        |
| Y627*   | Non-sense   | 1  | Gemline        | Pleuropulmonary blastoma <sup>10</sup>       |
| R646*   | Non-sense   | 1  | Gemline        | Pleuropulmonary blastoma <sup>10</sup>       |
| R656*   | Non-sense   | 1  | Germline       | Pleuropulmonary blastoma <sup>7</sup>        |
| V680fs  | Frame-shift | 1  | Germline       | Pleuropulmonary blastoma <sup>7</sup>        |
| Y739*   | Non-sense   | 1  | Gemline        | Pleuropulmonary blastoma <sup>10</sup>       |
| P740fs  | Frame-shift | 1  | Gemline        | Pleuropulmonary blastoma <sup>10</sup>       |
| T788fs  | Frame-shift | 1  | Gemline        | Pleuropulmonary blastoma <sup>10</sup>       |
| R934*   | Non-sense   | 1  | Gemline        | Pleuropulmonary blastoma <sup>10</sup>       |
| T955fs  | Frame-shift | 1  | Germline       | Pleuropulmonary blastoma <sup>8</sup>        |
| R1003*  | Non-sense   | 1  | Non-determined | Pleuropulmonary blastoma <sup>8</sup>        |
| Y1091*  | Non-sense   | 1  | Germline       | Pleuropulmonary blastoma <sup>7</sup>        |
| P1161fs | Frame-shift | 1  | Germline       | Pleuropulmonary blastoma <sup>8</sup>        |
| Y1170*  | Non-sense   | 1  | Gemline        | Pleuropulmonary blastoma <sup>10</sup>       |
| C1197fs | Frame-shift | 1  | Germline       | Pleuropulmonary blastoma <sup>7</sup>        |
| S1250fs | Frame-shift | 1  | Germline       | Pleuropulmonary blastoma <sup>8</sup>        |
| L1469fs | Frame-shift | 1  | Germline       | Pleuropulmonary blastoma <sup>7</sup>        |
| W1506*  | Non-sense   | 1  | Germline       | Pleuropulmonary blastoma <sup>7</sup>        |
| E1519*  | Non-sense   | 1  | Germline       | Pleuropulmonary blastoma <sup>11</sup>       |
| L1573R  | Mis-sense   | 1  | Gemline        | Pleuropulmonary blastoma <sup>10</sup>       |
| S1637*  | Non-sense   | 1  | Non-determined | Pleuropulmonary blastoma <sup>8</sup>        |
| D1654fs | Frame-shift | 1  | Germline       | Pleuropulmonary blastoma <sup>7</sup>        |
| E1705K  | Mis-sense   | 8  | Somatic        | Pleuropulmonary blastoma <sup>7</sup>        |
| E1705V  | Mis-sense   | 1  | Non-determined | Pleuropulmonary blastoma <sup>8</sup>        |
| G1708E  | Mis-sense   | 1  | Somatic        | Pleuropulmonary blastoma <sup>7</sup>        |
| D1709N  | Mis-sense   | 7  | Somatic        | Pleuropulmonary blastoma <sup>7, 8</sup>     |
| K1798fs | Frame-shift | 1  | Germline       | Pleuropulmonary blastoma <sup>7</sup>        |
| G1809R  | Mis-sense   | 24 | Somatic        | Pleuropulmonary blastoma <sup>7, 8</sup>     |
| D1810Y  | Mis-sense   | 5  | Somatic        | Pleuropulmonary blastoma <sup>7, 8</sup>     |
| E1813D  | Mis-sense   | 2  | Somatic        | Pleuropulmonary blastoma <sup>7</sup>        |
| E1813G  | Mis-sense   | 7  | Somatic        | Pleuropulmonary blastoma <sup>7, 8, 11</sup> |

|         |             |    |                |                                                 |
|---------|-------------|----|----------------|-------------------------------------------------|
| E1813K  | Mis-sense   | 1  | Somatic        | Pleuropulmonary blastoma <sup>7</sup>           |
| E1813Q  | Mis-sense   | 1  | Somatic        | Pleuropulmonary blastoma <sup>7</sup>           |
| Y1820*  | Non-sense   | 1  | Germline       | Pleuropulmonary blastoma <sup>8</sup>           |
| E503*   | Non-sense   | 1  | Germline       | Nonepithelial ovarian cancers <sup>12</sup>     |
| R459fs  | Frame-shift | 1  | Germline       | Nonepithelial ovarian cancers <sup>12</sup>     |
| C748fs  | Frame-shift | 1  | Germline       | Nonepithelial ovarian cancers <sup>12</sup>     |
| Y819*   | Non-sense   | 1  | Germline       | Nonepithelial ovarian cancers <sup>13</sup>     |
| P942*   | Non-sense   | 1  | Germline       | Nonepithelial ovarian cancers <sup>13</sup>     |
| E1025*  | Non-sense   | 2  | Germline       | Nonepithelial ovarian cancers <sup>12</sup>     |
| G1079*  | Non-sense   | 1  | Somatic        | Nonepithelial ovarian cancers <sup>13</sup>     |
| Y1204*  | Non-sense   | 1  | Germline       | Nonepithelial ovarian cancers <sup>13</sup>     |
| V1260fs | Frame-shift | 1  | Germline       | Nonepithelial ovarian cancers <sup>12</sup>     |
| D1699fs | Frame-shift | 1  | Germline       | Nonepithelial ovarian cancers <sup>12</sup>     |
| R1703*  | Non-sense   | 1  | Germline       | Nonepithelial ovarian cancers <sup>13</sup>     |
| E1705K  | Mis-sense   | 6  | Somatic        | Nonepithelial ovarian cancers <sup>13, 14</sup> |
| D1709N  | Mis-sense   | 13 | Somatic        | Nonepithelial ovarian cancers <sup>13, 14</sup> |
| D1709N  | Mis-sense   | 1  | Non-determined | Nonepithelial ovarian cancers <sup>12</sup>     |
| D1709E  | Mis-sense   | 3  | Somatic        | Nonepithelial ovarian cancers <sup>13</sup>     |
| D1709G  | Mis-sense   | 3  | Somatic        | Nonepithelial ovarian cancers <sup>13</sup>     |
| E1788fs | Frame-shift | 5  | Somatic        | Nonepithelial ovarian cancers <sup>14</sup>     |
| D1810H  | Mis-sense   | 1  | Somatic        | Nonepithelial ovarian cancers <sup>13</sup>     |
| D1810N  | Mis-sense   | 1  | Somatic        | Nonepithelial ovarian cancers <sup>13</sup>     |
| D1810Y  | Mis-sense   | 4  | Somatic        | Nonepithelial ovarian cancers <sup>13, 14</sup> |
| D1810V  | Mis-sense   | 1  | Somatic        | Nonepithelial ovarian cancers <sup>14</sup>     |
| E1813A  | Mis-sense   | 1  | Non-determined | Nonepithelial ovarian cancers <sup>12</sup>     |
| E1813D  | Mis-sense   | 2  | Somatic        | Nonepithelial ovarian cancers <sup>14</sup>     |
| E1813K  | Mis-sense   | 2  | Somatic        | Nonepithelial ovarian cancers <sup>13, 14</sup> |
| E1813G  | Mis-sense   | 2  | Somatic        | Nonepithelial ovarian cancers <sup>13</sup>     |
| E1813Q  | Mis-sense   | 4  | Somatic        | Nonepithelial ovarian cancers <sup>13, 14</sup> |
| W1831*  | Non-sense   | 1  | Somatic        | Nonepithelial ovarian cancers <sup>13</sup>     |
| Q48E    | Mis-sense   | 1  | Somatic        | Wilms tumour <sup>1</sup>                       |
| I85M    | Mis-sense   | 1  | Somatic        | Wilms tumour <sup>1</sup>                       |
| I85M    | Mis-sense   | 1  | Germline       | Wilms tumors <sup>2</sup>                       |
| R307fs  | Frame-shift | 4  | Germline       | Wilms tumors <sup>9, 15</sup>                   |
| S436fs  | Frame-shift | 2  | Germline       | Wilms tumors <sup>9, 15</sup>                   |

|         |             |   |                |                                  |
|---------|-------------|---|----------------|----------------------------------|
| P645*   | Non-sense   | 2 | Somatic        | Wilms tumors <sup>15</sup>       |
| G706fs  | Frame-shift | 4 | Germline       | Wilms tumors <sup>9, 15</sup>    |
| A872T   | Mis-sense   | 1 | Germline       | Wilms tumors <sup>15</sup>       |
| L999*   | Non-sense   | 3 | Somatic        | Wilms tumors <sup>15</sup>       |
| R1003Q  | Mis-sense   | 1 | Germline       | Wilms tumors <sup>2</sup>        |
| A1011*  | Non-sense   | 1 | Somatic        | Wilms tumors <sup>15</sup>       |
| R1071*  | Non-sense   | 1 | Somatic        | Wilms tumors <sup>15</sup>       |
| I1102fs | Frame-shift | 1 | Somatic        | Wilms tumors <sup>3</sup>        |
| I1110V  | Mis-sense   | 1 | Non-determined | Wilms tumors <sup>15</sup>       |
| K1324*  | Non-sense   | 2 | Somatic        | Wilms tumors <sup>15</sup>       |
| S1344L  | Mis-sense   | 1 | Somatic        | Wilms tumors <sup>15</sup>       |
| R1386C  | Mis-sense   | 1 | Germline       | Wilms tumors <sup>2</sup>        |
| S1505*  | Non-sense   | 1 | Somatic        | Wilms tumors <sup>15</sup>       |
| A1560*  | Non-sense   | 2 | Somatic        | Wilms tumors <sup>15</sup>       |
| H1693N  | Mis-sense   | 1 | Germline       | Wilms tumors <sup>2</sup>        |
| E1705K  | Mis-sense   | 2 | Germline       | Wilms tumors <sup>2</sup>        |
| D1709N  | Mis-sense   | 2 | Germline       | Wilms tumors <sup>2</sup>        |
| D1713A  | Mis-sense   | 1 | Somatic        | Wilms tumors <sup>15</sup>       |
| D1713V  | Mis-sense   | 1 | Germline       | Wilms tumors <sup>2</sup>        |
| L1777H  | Mis-sense   | 1 | Germline       | Wilms tumors <sup>15</sup>       |
| E1788fs | Frame-shift | 2 | Somatic        | Wilms tumors <sup>15</sup>       |
| G1809R  | Mis-sense   | 1 | Somatic        | Wilms tumors <sup>3</sup>        |
| G1809V  | Mis-sense   | 1 | Somatic        | Wilms tumors <sup>3</sup>        |
| D1810N  | Mis-sense   | 1 | Somatic        | Wilms tumour <sup>1</sup>        |
| D1810N  | Mis-sense   | 2 | Germline       | Wilms tumors <sup>2</sup>        |
| A1818T  | Mis-sense   | 1 | Somatic        | Wilms tumors <sup>15</sup>       |
| G1886R  | Mis-sense   | 1 | Germline       | Wilms tumors <sup>4</sup>        |
| K429fs  | Frame-shift | 1 | Germline       | Pituitary blastoma <sup>16</sup> |
| R509*   | Non-sense   | 1 | Germline       | Pituitary blastoma <sup>16</sup> |
| R676*   | Non-sense   | 2 | Germline       | Pituitary blastoma <sup>16</sup> |
| Y793*   | Non-sense   | 1 | Germline       | Pituitary blastoma <sup>16</sup> |
| N1093*  | Non-sense   | 1 | Germline       | Pituitary blastoma <sup>16</sup> |
| S1179fs | Frame-shift | 1 | Germline       | Pituitary blastoma <sup>16</sup> |
| D1437fs | Frame-shift | 1 | Germline       | Pituitary blastoma <sup>16</sup> |
| D1709H  | Mis-sense   | 1 | Germline       | Pituitary blastoma <sup>16</sup> |

|         |             |   |                |                                                 |
|---------|-------------|---|----------------|-------------------------------------------------|
| D1709T  | Mis-sense   | 1 | Somatic        | Pituitary blastoma <sup>16</sup>                |
| D1709N  | Mis-sense   | 1 | Somatic        | Pituitary blastoma <sup>16</sup>                |
| G1809W  | Mis-sense   | 1 | Somatic        | Pituitary blastoma <sup>16</sup>                |
| E1813D  | Mis-sense   | 1 | Somatic        | Pituitary blastoma <sup>16</sup>                |
| E1813V  | Mis-sense   | 1 | Somatic        | Pituitary blastoma <sup>16</sup>                |
| E1813K  | Mis-sense   | 2 | Somatic        | Pituitary blastoma <sup>16</sup>                |
| Y793*   | Non-sense   | 1 | Germline       | Differentiated thyroid arcinoma <sup>17</sup>   |
| S1169fs | Frame-shift | 1 | Germline       | Differentiated thyroid carcinoma <sup>17</sup>  |
| N1193fs | Frame-shift | 1 | Germline       | Differentiated thyroid carcinoma <sup>17</sup>  |
| E1705K  | Mis-sense   | 1 | Somatic        | Differentiated thyroid carcinoma <sup>17</sup>  |
| E1813D  | Mis-sense   | 1 | Somatic        | Differentiated thyroid carcinoma <sup>17</sup>  |
| E1813G  | Mis-sense   | 1 | Somatic        | Differentiated thyroid carcinoma <sup>17</sup>  |
| Q249fs  | Frame-shift | 1 | Non-determined | Childhood cystic nephroma <sup>18</sup>         |
| S396R   | Mis-sense   | 1 | Non-determined | Childhood cystic nephroma <sup>18</sup>         |
| K429fs  | Frame-shift | 1 | Non-determined | Childhood cystic nephroma <sup>18</sup>         |
| R509*   | Non-sense   | 1 | Non-determined | Childhood cystic nephroma <sup>18</sup>         |
| P817fs  | Frame-shift | 1 | Non-determined | Childhood cystic nephroma <sup>18</sup>         |
| Y976*   | Non-sense   | 1 | Non-determined | Childhood cystic nephroma <sup>18</sup>         |
| V990fs  | Frame-shift | 1 | Non-determined | Childhood cystic nephroma <sup>18</sup>         |
| L1012fs | Frame-shift | 1 | Non-determined | Childhood cystic nephroma <sup>18</sup>         |
| Q1031*  | Non-sense   | 1 | Non-determined | Childhood cystic nephroma <sup>18</sup>         |
| K1324fs | Frame-shift | 1 | Non-determined | Childhood cystic nephroma <sup>18</sup>         |
| Y1335*  | Non-sense   | 1 | Non-determined | Childhood cystic nephroma <sup>18</sup>         |
| P1336fs | Frame-shift | 1 | Non-determined | Childhood cystic nephroma <sup>18</sup>         |
| D1437fs | Frame-shift | 4 | Germline       | Familial cystic nephroma <sup>19</sup>          |
| E1705K  | Mis-sense   | 3 | Non-determined | Childhood cystic nephroma <sup>18</sup>         |
| D1709N  | Mis-sense   | 3 | Non-determined | Childhood cystic nephroma <sup>18</sup>         |
| E1778fs | Frame-shift | 1 | Non-determined | Childhood cystic nephroma <sup>18</sup>         |
| G1809R  | Mis-sense   | 2 | Non-determined | Childhood cystic nephroma <sup>18</sup>         |
| D1810H  | Mis-sense   | 1 | Non-determined | Childhood cystic nephroma <sup>18</sup>         |
| E1813D  | Mis-sense   | 5 | Non-determined | Childhood cystic nephroma <sup>18</sup>         |
| E1813G  | Mis-sense   | 3 | Non-determined | Childhood cystic nephroma <sup>18</sup>         |
| E1813K  | Mis-sense   |   | Non-determined | Childhood cystic nephroma <sup>18</sup>         |
| S1826*  | Non-sense   | 5 | Germline       | Familial cystic nephroma <sup>19</sup>          |
| Y637*   | Non-sense   | 1 | Germline       | Embryonal rhabdomyosarcoma (ERMS) <sup>20</sup> |

|                |             |    |                |                                                 |
|----------------|-------------|----|----------------|-------------------------------------------------|
| G706fs         | Frame-shift | 3  | Germline       | Cervix embryonal rhabdomyosarcoma <sup>9</sup>  |
| Y749*          | Non-sense   | 1  | Germline       | Embryonal rhabdomyosarcoma (ERMS) <sup>20</sup> |
| S1179fs        | Frame-shift | 1  | Germline       | Embryonal Rhabdomyosarcoma <sup>21</sup>        |
| Y1204fs        | Frame-shift | 3  | Germline       | Cervix embryonal rhabdomyosarcoma <sup>9</sup>  |
| L1303*         | Non-sense   | 1  | Germline       | Rhabdomyosarcoma <sup>13</sup>                  |
| L1303fs        | Frame-shift | 4  | Germline       | Cervix embryonal rhabdomyosarcoma <sup>9</sup>  |
| E1418_E1420del | Deletion    | 1  | Somatic        | Embryonal rhabdomyosarcoma (ERMS) <sup>20</sup> |
| D1437fs        | Frame-shift | 1  | Germline       | Embryonal rhabdomyosarcoma (ERMS) <sup>20</sup> |
| Q1702*         | Non-sense   | 1  | Germline       | Embryonal rhabdomyosarcoma (ERMS) <sup>20</sup> |
| E1705K         | Mis-sense   | 1  | Somatic        | Rhabdomyosarcoma <sup>13</sup>                  |
| L1789fs        | Frame-shift | 1  | Somatic        | Embryonal rhabdomyosarcoma (ERMS) <sup>20</sup> |
| E1813K         | Mis-sense   | 1  | Somatic        | Embryonal Rhabdomyosarcoma <sup>21</sup>        |
| P291*          | Non-sense   | 4  | Germline       | Nontoxic multinodular goiter <sup>22</sup>      |
| R509*          | Non-sense   | 1  | Non-determined | Multinodular goiter <sup>23</sup>               |
| S839F          | Mis-sense   | 20 | Germline       | Nontoxic multinodular goiter <sup>22</sup>      |
| I813_Y819del   | Deletion    | 3  | Germline       | Nontoxic multinodular goiter <sup>22</sup>      |
| R935_R996 del  | Deletion    | 8  | Germline       | Nontoxic multinodular goiter <sup>22</sup>      |
| R1672*         | Non-sense   | 2  | Germline       | Nontoxic multinodular goiter <sup>22</sup>      |
| N1742_F1745del | Deletion    | 2  | Germline       | Multinodular Goiter <sup>24</sup>               |
| R656*          | Non-sense   | 4  | Germline       | Pulmonary sequestration <sup>9</sup>            |
| V1351fs        | Frame-shift | 1  | Germline       | Primitive neuroectodermal tumor <sup>9</sup>    |
| F1706L         | Mis-sense   | 1  | Non-determined | Non-small cell lung cancers <sup>25</sup>       |
| L1712fs        | Frame-shift | 1  | Non-determined | Gastric carcinoma <sup>25</sup>                 |
| E1801fs        | Frame-shift | 1  | Non-determined | Prostate carcinoma <sup>25</sup>                |
| E1797D         | Mis-sense   | 1  | Non-determined | Soft tissue sarcoma <sup>25</sup>               |

## References

1. Torrezan, G.T. et al. Recurrent somatic mutation in DROSHA induces microRNA profile changes in Wilms tumour. *Nat Commun* **5**, 4039 (2014).
2. Walz, A.L. et al. Recurrent DGCR8, DROSHA, and SIX Homeodomain Mutations in Favorable Histology Wilms Tumors. *Cancer Cell* **27**, 286-97 (2015).
3. Rakheja, D. et al. Somatic mutations in DROSHA and DICER1 impair microRNA biogenesis through distinct mechanisms in Wilms tumours. *Nat Commun* **2**, 4802 (2014).

4. Wegert, J. et al. Mutations in the SIX1/2 Pathway and the DROSHA/DGCR8 miRNA Microprocessor Complex Underlie High-Risk Blastemal Type Wilms Tumors. *Cancer Cell* **27**, 298-311 (2015).
5. Melo, S.A. et al. A genetic defect in exportin-5 traps precursor microRNAs in the nucleus of cancer cells. *Cancer Cell* **18**, 303-15 (2010).
6. Melo, S.A. et al. A TARBP2 mutation in human cancer impairs microRNA processing and DICER1 function. *Nat Genet* **41**, 365-70 (2009).
7. Pugh, T.J. et al. Exome sequencing of pleuropulmonary blastoma reveals frequent biallelic loss of TP53 and two hits in DICER1 resulting in retention of 5p-derived miRNA hairpin loop sequences. *Oncogene* **0** (2014).
8. Seki, M. et al. Biallelic DICER1 mutations in sporadic pleuropulmonary blastoma. *Cancer Res* **74**, 2742-9 (2014).
9. Foulkes, W.D. et al. Extending the phenotypes associated with DICER1 mutations. *Hum Mutat* **32**, 1381-4 (2011).
10. Hill, D.A. et al. DICER1 mutations in familial pleuropulmonary blastoma. *Science* **325**, 965 (2009).
11. de Kock, L. et al. Germ-line and somatic DICER1 mutations in a pleuropulmonary blastoma. *Pediatr Blood Cancer* **60**, 2091-2 (2013).
12. Schultz, K.A. et al. Ovarian sex cord-stromal tumors, pleuropulmonary blastoma and DICER1 mutations: a report from the International Pleuropulmonary Blastoma Registry. *Gynecol Oncol* **122**, 246-50 (2011).
13. Heravi-Moussavi, A. et al. Recurrent somatic DICER1 mutations in nonepithelial ovarian cancers. *N Engl J Med* **366**, 234-42 (2012).
14. Witkowski, L. et al. DICER1 hotspot mutations in non-epithelial gonadal tumours. *Br J Cancer* **109**, 2744-50 (2013).
15. Wu, M.K. et al. Biallelic DICER1 mutations occur in Wilms tumours. *J Pathol* **230**, 154-64 (2013).
16. de Kock, L. et al. Pituitary blastoma: a pathognomonic feature of germ-line DICER1 mutations. *Acta Neuropathol* **128**, 111-22 (2014).
17. de Kock, L. et al. Exploring the association Between DICER1 mutations and differentiated thyroid carcinoma. *J Clin Endocrinol Metab* **99**, E1072-7 (2014).
18. Doros, L.A. et al. DICER1 mutations in childhood cystic nephroma and its relationship to DICER1-renal sarcoma. *Mod Pathol* (2014).
19. Bahubeshi, A. et al. Germline DICER1 mutations and familial cystic nephroma. *J Med Genet* **47**, 863-6 (2010).
20. Doros, L. et al. DICER1 mutations in embryonal rhabdomyosarcomas from children with and without familial PPB-tumor predisposition syndrome. *Pediatr Blood Cancer* **59**, 558-60 (2012).
21. Tomiak, E., de Kock, L., Grynspan, D., Ramphal, R. & Foulkes, W.D. DICER1 mutations in an adolescent with cervical embryonal rhabdomyosarcoma (cERMS). *Pediatr Blood Cancer* **61**, 568-9 (2014).
22. Rio Frio, T. et al. DICER1 mutations in familial multinodular goiter with and without ovarian Sertoli-Leydig cell tumors. *JAMA* **305**, 68-77 (2011).
23. Darrat, I., Bedoyan, J.K., Chen, M., Schuette, J.L. & Lesperance, M.M. Novel DICER1 mutation as cause of multinodular goiter in children. *Head Neck* **35**, E369-71 (2013).
24. Rath, S.R. et al. Multinodular Goiter in children: an important pointer to a germline DICER1 mutation. *J Clin Endocrinol Metab* **99**, 1947-8 (2014).
25. Kim, M.S., Lee, S.H. & Yoo, N.J. DICER1 exons 25 and 26 mutations are rare in common human tumours besides Sertoli-Leydig cell tumour. *Histopathology* **63**, 436-8 (2013).
